# Supplementary material
Source: publisher figshare collection journal article supplement (https://frontiersin.figshare.com/ndownloader/files/14055152)
Supplement: Supplementary file 1 [file 14055152]

## APPENDIX A: PARENT FIRST-ORDER ACTIONS

In this paper, we only consider the familiar “standard” second-order actions of dual graviton and spin- $s$  fields. In this Appendix, we briefly explain the “parent” first-order actions of dual gravity introduced in [44] and spin- $s$  fields in [47].

In general relativity, the Einstein-Hilbert action  $S_{\text{EH}} = \int d^D x \mathcal{L}_{\text{EH}} = \int d^D x R$  can be written in the tetrad formalism as follows

$$\mathcal{L}_{\text{EH}}[e] = -e(2\Omega_{ac|b}\Omega^{ab|c} + \Omega_{ab|c}\Omega^{ab|c} - 4\Omega_{ab|}{}^b\Omega^{ac|}{}_c), \quad (\text{A1})$$

where

$$\Omega_{bc}{}^a = e_b{}^\mu e_c{}^\nu \Omega_{\mu\nu}{}^a, \quad \Omega_{\mu\nu}{}^a = \Omega_{[\mu\nu]}{}^a = 2\partial_{[\mu} e_{\nu]}{}^a. \quad (\text{A2})$$

The tetradic Einstein-Hilbert action (A1) is equivalent to the following parent first-order form in terms of an auxiliary background field  $F_{ab|c}$  with mixed symmetry  $(2, 1)$  that describes Einstein gravity in  $D$  dimensions [44]:

$$\mathcal{L}[F, e] = -2e \left( \Omega_{ac|b} F^{ab|c} + \frac{1}{2} F_{ab|c} F^{ab|c} - \frac{1}{2(D-2)} F_{ab|}{}^b F^{ac|}{}_c \right), \quad (\text{A3})$$

The background field  $F_{ab|c}$  can be dualized to a dual field  $\bar{F}_{a_1 \dots a_{D-2}|b}$  with mixed symmetry  $(D-2, 1)$  as follows [44]:

$$F^{ab|c} = \frac{1}{(D-2)!} \epsilon^{abd_1 \dots d_{D-2}} \bar{F}_{d_1 \dots d_{D-2}|}{}^c. \quad (\text{A4})$$

This suggests the standard action of gravity in  $D$  dimensions [44]:

$$\begin{aligned} \mathcal{L}[\bar{F}, e] = -2e & \left( \frac{1}{(D-2)!} \epsilon^{abd_1 \dots d_{D-2}} \bar{F}_{d_1 \dots d_{D-2}|}{}^c \Omega_{ac|b} \right. \\ & + \frac{1}{2(D-2)!} \bar{F}_{a_1 \dots a_{D-2}|c} \bar{F}^{a_1 \dots a_{D-2}|c} \\ & \left. - \frac{1}{2(D-3)!} \bar{F}_{a_1 \dots a_{D-3}|b}{}^b \bar{F}^{a_1 \dots a_{D-3}|c}{}_c \right). \end{aligned} \quad (\text{A5})$$

Considering  $e_\mu{}^a = \delta_\mu{}^a + h_\mu{}^a$  around flat space in the linearized theory, Eq. (A2) reduces to  $\Omega_{\mu\nu}{}^a = 2\partial_{[\mu} h_{\nu]}{}^a$  [134], where  $h_\mu{}^a$  corresponds to the graviton  $h_a{}^b$  in the  $E_D \otimes_s l_1$  non-linear realization (see Section 2.3). The dual field  $\bar{F}_{a_1 \dots a_{D-2}|b}$  is also associated with:

$$\bar{F}_{\mu_1 \dots \mu_{D-2}}{}^a = (D-2) \partial_{[\mu_1} \tilde{h}_{\mu_2 \dots \mu_{D-2}]}{}^a, \quad (\text{A6})$$

where  $h_{\mu_1 \dots \mu_{D-3}}{}^a$  is a mixed symmetry  $(D-3, 1)$  tensor corresponds to the dual graviton  $h_{a_1 \dots a_{D-3}}{}^b$  in  $D$  dimensions under the  $E_D \otimes_s l_1$  non-linear realization. The parent action (A5) contains the generalized Curtright action (88) that should support the action (87) for the dual graviton in  $D$  dimensions [47, 134].

Similarly, for spin- $s$  fields we have the following tetradic parent first-order action in  $D$  dimensions [47]

$$\begin{aligned} \mathcal{L}[F, e] = -2e & \left( \Omega_{ac_1|bc_2 \dots c_{s-1}} F^{ab|c_1 \dots c_{s-1}} \right. \\ & + \frac{(s-1)^2}{s} F_{ab|c_1 \dots c_{s-1}} F^{ab|c_1 \dots c_{s-1}} \\ & + \frac{(s-1)(s-2)}{s} F_{ab|c_1 \dots c_{s-1}} F^{ac_1|bc_2 \dots c_{s-1}} \\ & + \frac{(s-1)^2(s-3)}{s(D+s-4)} F_{ab|c_1 \dots c_{s-2}}{}^b F^{ad|c_1 \dots c_{s-2}}{}_d \\ & \left. + \frac{(s-1)^2(s-2)}{s(D+s-4)} F_{ab|c_1 \dots c_{s-2}}{}^a F^{dc_1|bc_2 \dots c_{s-2}}{}_d \right), \end{aligned} \quad (\text{A7})$$

where  $F_{ab|c_1 \dots c_{s-1}}$  is an auxiliary background field, and the field  $\Omega_{ab|c_1 \dots c_{s-1}}$  is defined as

$$\Omega_{ab}{}^{c_1 \dots c_{s-1}} = e_a{}^\mu e_b{}^\nu \Omega_{\mu\nu}{}^{c_1 \dots c_{s-1}}, \quad (\text{A8})$$

$$\Omega_{\mu\nu}{}^{c_1 \dots c_{s-1}} = \Omega_{[\mu\nu]}{}^{c_1 \dots c_{s-1}} = 2\partial_{[\mu} e_{\nu]}{}^{c_1 \dots c_{s-1}}. \quad (\text{A9})$$

In the linearized level,  $\Omega_{\mu\nu|}^{a_1 \dots a_{s-1}} = 2\partial_{[\mu} h_{\nu]}^{a_1 \dots a_{s-1}}$ , where  $h_{\mu}^{a_1 \dots a_{s-1}}$  describes the spin- $s$  field.

The background field  $F_{ab|c_1 \dots c_{s-1}}$  is dualized to a dual field  $\bar{F}_{a_1 \dots a_{D-2}|b_1 \dots b_{s-1}}$  as follows:

$$F^{ab|c_1 \dots c_{s-1}} = \frac{1}{(D-2)!} \epsilon^{abd_1 \dots d_{D-2}} \bar{F}_{d_1 \dots d_{D-2}|}^{c_1 \dots c_{s-1}}. \quad (\text{A10})$$

This hints at the standard action of spin- $s$  fields in  $D$  dimensions [47]:

$$\begin{aligned} \mathcal{L}[\bar{F}, e] = & -2e \left( \frac{1}{(D-2)!} \epsilon^{abd_1 \dots d_{D-2}} \bar{F}_{d_1 \dots d_{D-2}|}^{c_1 \dots c_{s-1}} \Omega_{ac_1|bc_2 \dots c_{s-1}} \right. \\ & + \frac{(s-1)^2}{s(D-2)!} \bar{F}_{a_1 \dots a_{D-2}|c_1 \dots c_{s-1}} \bar{F}^{a_1 \dots a_{D-2}|c_1 \dots c_{s-1}} \\ & + \frac{(s-1)(s-2)}{s(D-3)!} \bar{F}_{abd_1 \dots d_{D-4}|c_1 \dots c_{s-1}} \bar{F}^{ac_1 d_1 \dots d_{D-4}|bc_2 \dots c_{s-1}} \\ & + \frac{(s-1)^2(s-3)(D-2)}{s(D+s-4)(D-3)!} \bar{F}_{a_1 \dots a_{D-3}b|c_1 \dots c_{s-2}}^b \bar{F}^{a_1 \dots a_{D-3}d|c_1 \dots c_{s-2}d} \\ & \left. + \frac{(s-1)^2(s-2)(D-2)}{s(D+s-4)(D-3)!} \bar{F}_{abd_1 \dots d_{D-4}|c_1 \dots c_{s-2}}^a \bar{F}^{dc_1 d_1 \dots d_{D-4}|bc_2 \dots c_{s-2}d} \right), \quad (\text{A11}) \end{aligned}$$

where  $\bar{F}_{a_1 \dots a_{D-2}|b_1 \dots b_{s-1}}$  is associated with the dual spin- $s$  field strength tensor defined as

$$\bar{F}_{\mu_1 \dots \mu_{D-2}}^{a_1 \dots a_{s-1}} = (D-2) \partial_{[\mu_1} \tilde{h}_{\mu_2 \dots \mu_{D-2}]^{a_1 \dots a_{s-1}}}, \quad (\text{A12})$$

where  $\tilde{h}_{\mu_1 \dots \mu_{D-3}}^{a_1 \dots a_{s-1}}$  describes the dual spin- $s$  field in  $D$  dimensions. We notice that the parent action (A11) includes the action (256), and should support the action (251).
